# Supplementary material
Source: HighWire-hosted journal article supplement (https://cmajopen.ca/highwire/filestream/90746/field_highwire_adjunct_files/2/open-2022-0181-3-at.pdf)
Supplement: open-2022-0181-3-at.pdf [file open-2022-0181-3-at.pdf]

**Appendix 3 – Taxonomic unit assignment for the models (for individuals without a diagnostic category in a given year)**

| Fiscal Year               | 2012/13   | 2013/14   | 2014/15   | 2015/16   | 2016/17     |
|---------------------------|-----------|-----------|-----------|-----------|-------------|
| Taxonomic Unit in the DAD |           |           | Neurology |           | Haematology |
| Taxonomic Unit assignment |           |           | Neurology |           | Haematology |
| Final Taxonomic Unit      | Neurology | Neurology | Neurology | Neurology | Haematology |

The diagram illustrates the flow of taxonomic unit assignment over five fiscal years (2012/13 to 2016/17). The 'Taxonomic Unit in the DAD' row shows Neurology in 2014/15 and Haematology in 2016/17. The 'Taxonomic Unit assignment' row shows Neurology in 2014/15 and Haematology in 2016/17. The 'Final Taxonomic Unit' row shows Neurology for all years from 2012/13 to 2015/16, and Haematology in 2016/17. Arrows labeled 1, 2, and 3 indicate the flow: 1 from DAD to assignment, 2 from assignment to final unit, and 3 from final unit to the next year's DAD.
